# Supplementary material for: Photophysicochemical, sonochemical, and biological properties of novel hexadeca-substituted phthalocyanines bearing fluorinated groups
Source: Royal Society of Chemistry journal article supplement (doi:10.1039/d1dt02919c), 2021-10-26

**Photophysicochemical, sonochemical, and biological properties of novel hexadeca-substituted phthalocyanines bearing fluorinated groups**

Nazli Farajzadeh, Çetin Çelik, Göknur Yaşa Atmaca, Sadin Özdemir, Serpil Gonca, Ali Erdoğan, Makbule Burkut Koçak

**Equipment**

IR spectra were recorded on a Perkin-Elmer Spectrum One spectrometer in a 4000-400  $\text{cm}^{-1}$  range at room temperature.  $^1\text{H}$  NMR spectra were recorded on an Agilent VNMRS 500 MHz spectrometer and chemical shifts ( $\delta$ ) are given in ppm. Electronic absorption spectra were obtained using a Scinco Lab Pro Plus UV/Vis spectrophotometer. Mass spectra were obtained using a Bruker Microflex MALDI-TOF mass spectrometer. Elemental analyses were performed with a Thermo Finnigan Flash EA 1112 apparatus at 950 – 1000 °C. Fluorescence spectra were recorded

on a Varian Eclipse spectrofluorometer using 1cm path length cuvettes at room temperature. Photo-irradiations were measured using a General Electric quartz line lamp (300W). A 600 nm glass cut off filter (Schott) and a water filter were used to filter off ultraviolet and infrared radiations respectively. An interference filter (Intor, 700 nm with a bandwidth of 40 nm) was additionally placed in the light path before the sample. Light intensities were measured with a POWER MAX5100 (Mol electron detector incorporated) power meter. Bandelin Ultrasonic RK 100 H was used for ultrasound irradiation. High-Purity materials consumed in this study were purchased from commercial suppliers.

<sup>1</sup>H NMR spectrum of compound 1

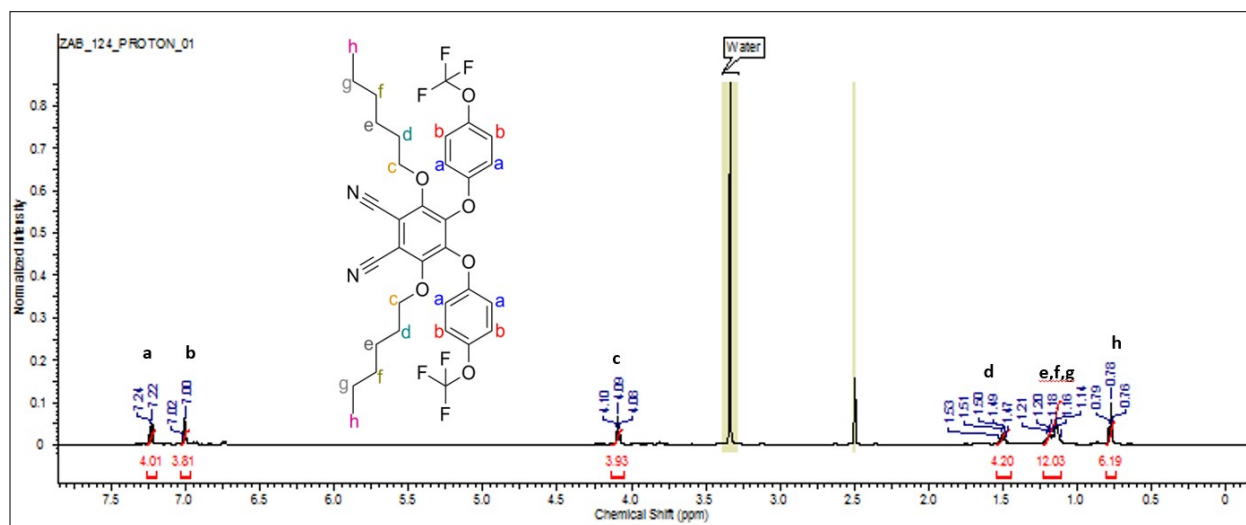

<sup>1</sup>H NMR spectrum of compound 2

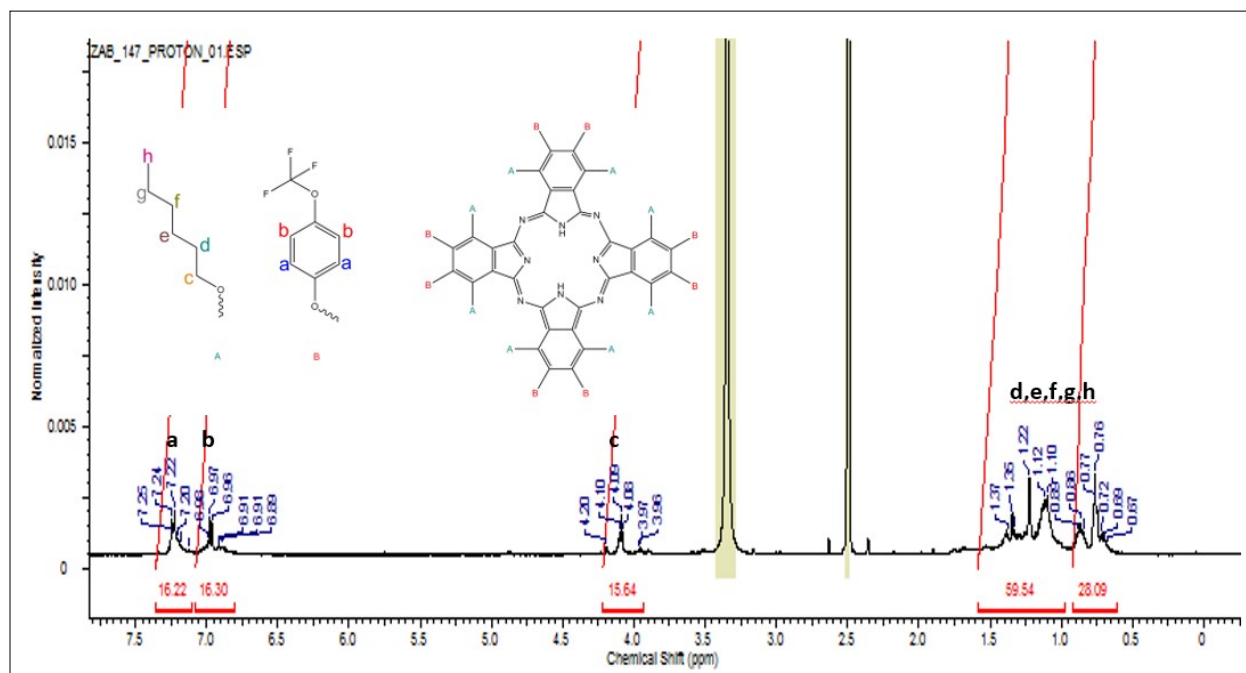

<sup>1</sup>H NMR spectrum of compound **3**

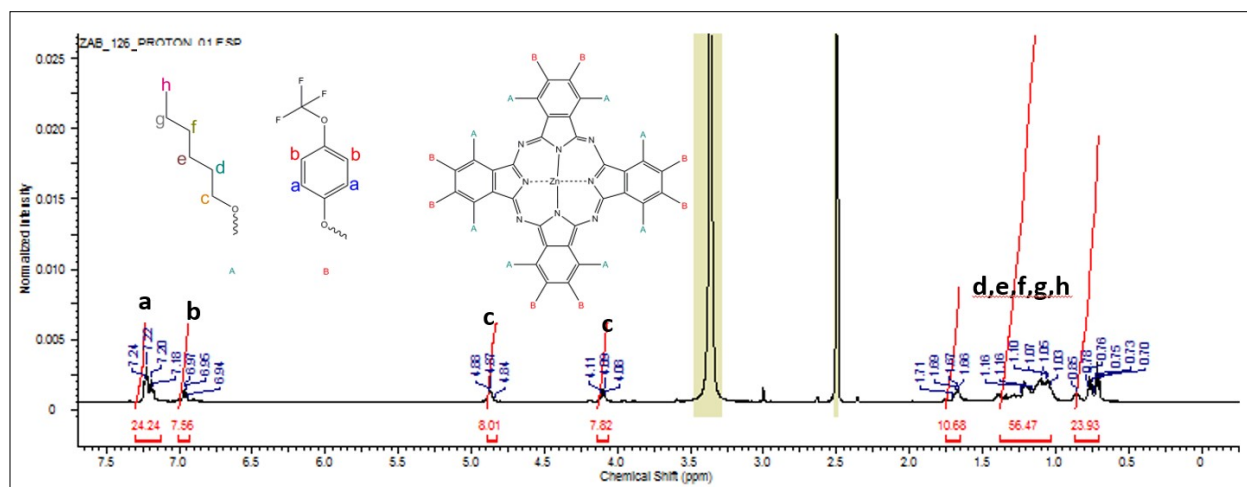

<sup>1</sup>H NMR spectrum of compound **6**

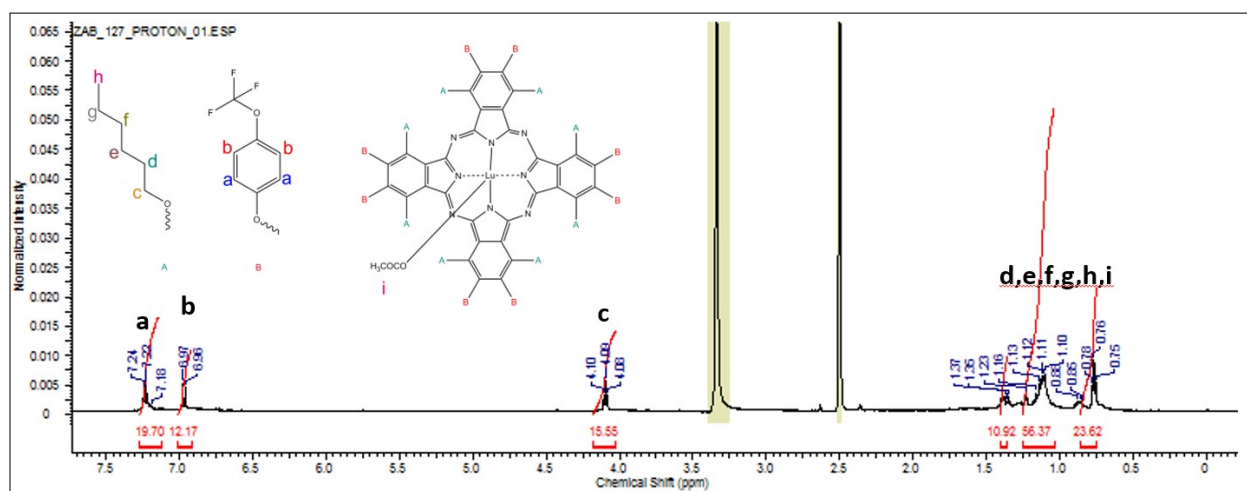

## Mass spectrum of compound 1

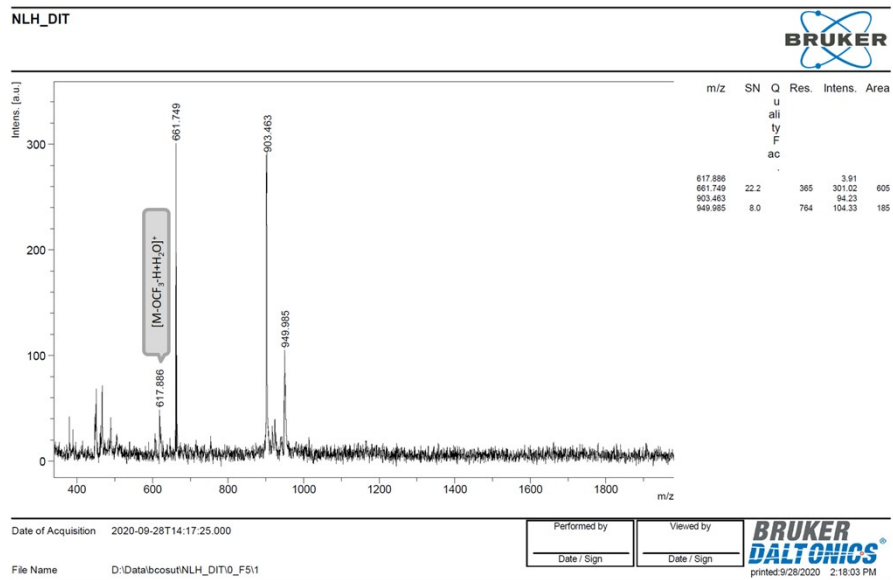

661.749 m/z:  $[2M-OCF_3+2H+2Na]^{2+}$ ; 903.463 m/z:  $[3M-3OCF_3-2H+Na]^{2+}$ ; 903.463 m/z:  $[3M-2OCF_3+5H+Na]^{2+}$

## Mass spectrum of compound 2

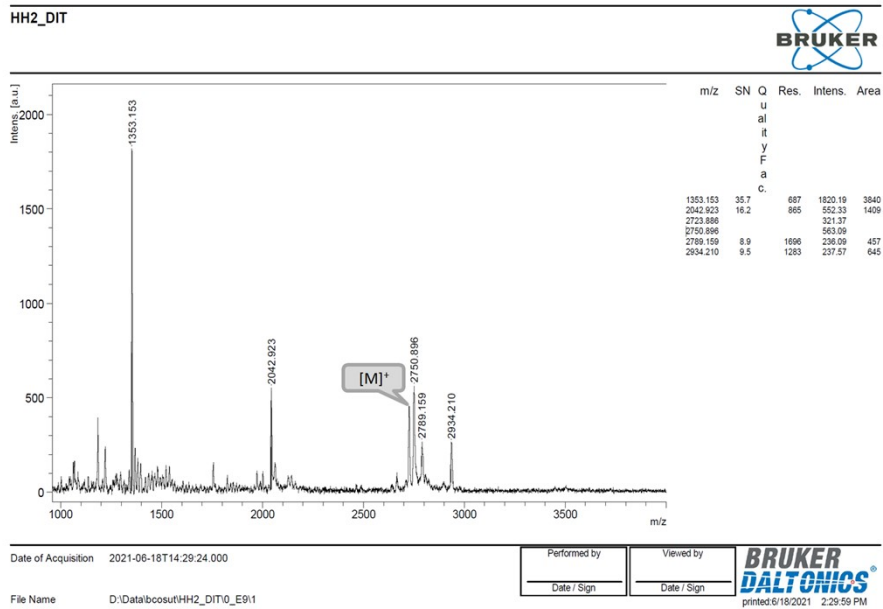

1353.153 m/z:  $[M-OCF_3+2H+H_2O+2Na]^{2+}$ ; 2042.923 m/z:  $[2M-2OCF_3+2H-H_2O+2DIT]^{3+}$ ; 2750.896 m/z:  $[M+3H+Na]^+$  2789.159 m/z:  $[M+H_2O+2Na]^+$ ; 2934.210 m/z:  $[M-3OCF_3-4H+2H_2O+DIT]^+$

### Mass spectrum of compound 3

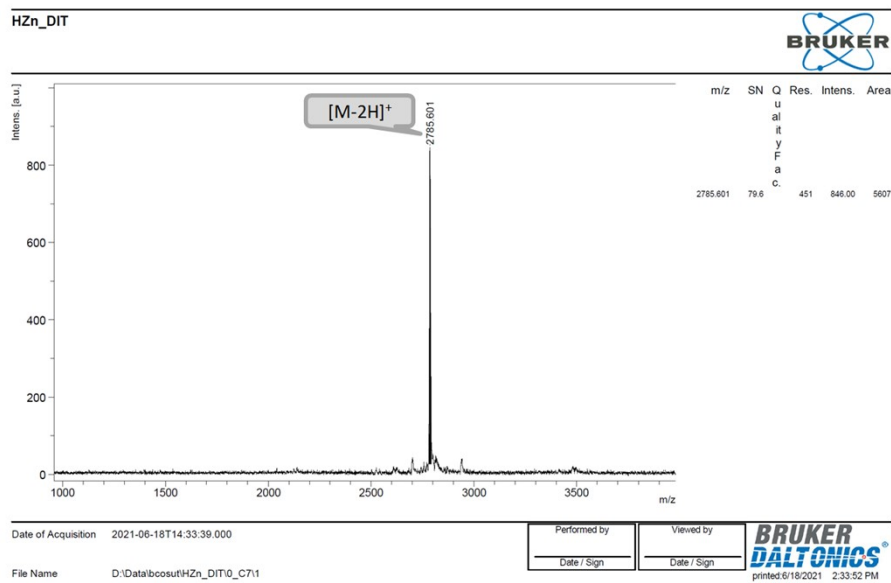

### Mass spectrum of compound 4

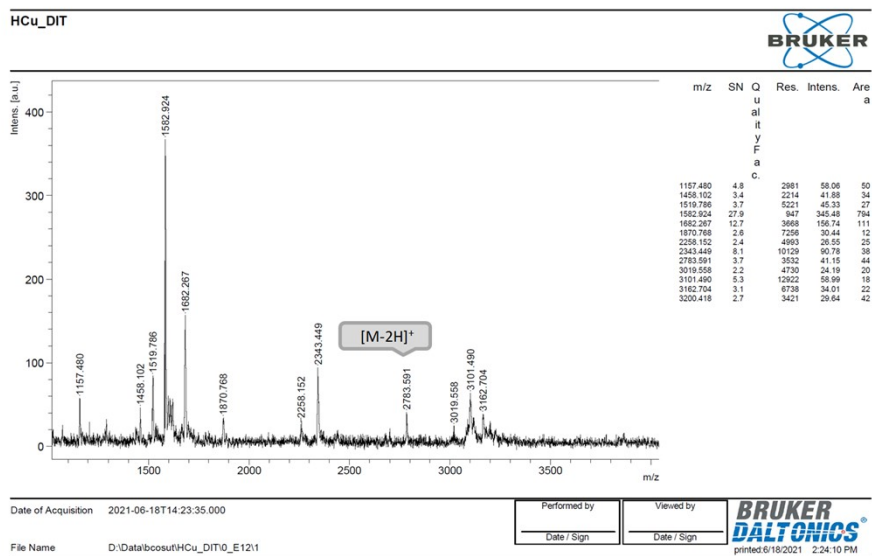

1157.480 m/z: [M-6OCF<sub>3</sub>+2H+2H<sub>2</sub>O]<sup>2+</sup>; 1458.102 m/z: [M-4OCF<sub>3</sub>+2H<sub>2</sub>O+DIT]<sup>2+</sup>; 1519.786 m/z: [M-2OCF<sub>3</sub>-H<sub>2</sub>O+DIT]<sup>2+</sup>; 1582.924 m/z: [M-2OCF<sub>3</sub>-H<sub>2</sub>O+DIT]<sup>2+</sup>; 1682.267 m/z: [2M-7OCF<sub>3</sub>-3H+4H<sub>2</sub>O]<sup>3+</sup>; 1870.768 [2M-H<sub>2</sub>O+Na]<sup>3+</sup>; 2258.152 [2M-13OCF<sub>3</sub>+H+3H<sub>2</sub>O]<sup>2+</sup>; 2343.449 m/z: [2M-11OCF<sub>3</sub>+H+3H<sub>2</sub>O]<sup>2+</sup>; 3019.558 m/z: [2M+2H<sub>2</sub>O+DIT]<sup>2+</sup>; 3101.490 m/z: [M-2OCF<sub>3</sub>+4H+3H<sub>2</sub>O+DIT]<sup>+</sup>; 3162.704 m/z: [M-OCF<sub>3</sub>+6H+Na+DIT]<sup>+</sup>

## Mass spectrum of compound 5

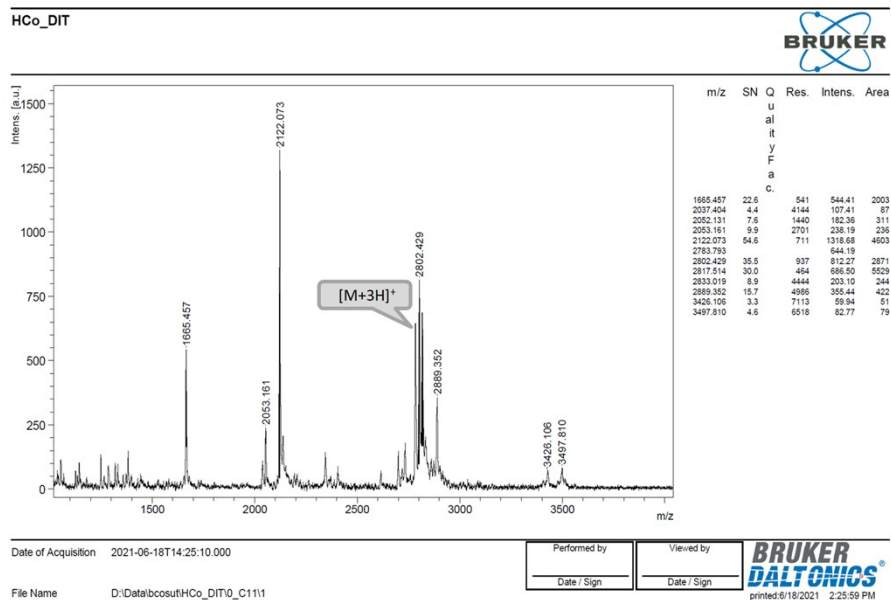

1665.457 m/z: [M-4OCF<sub>3</sub>+Na+2DIT]<sup>2+</sup>; 2053.161 m/z: [2M-4OCF<sub>3</sub>+4H<sub>2</sub>O+2DIT]<sup>3+</sup>; 2122.073 m/z: [M-8OCF<sub>3</sub>-2H+Na]<sup>+</sup>; 2802.429 m/z: [M-2H+Na]<sup>+</sup>; 2889.352 m/z: [M-4OCF<sub>3</sub>-3H+H<sub>2</sub>O+DIT]<sup>+</sup>; 3426.106 [M-3OCF<sub>3</sub>-2H+2H<sub>2</sub>O+2DIT]<sup>+</sup>; 3497.810 [M-2OCF<sub>3</sub>+2H+H<sub>2</sub>O+2DIT]<sup>+</sup>

## Mass spectrum of compound 6

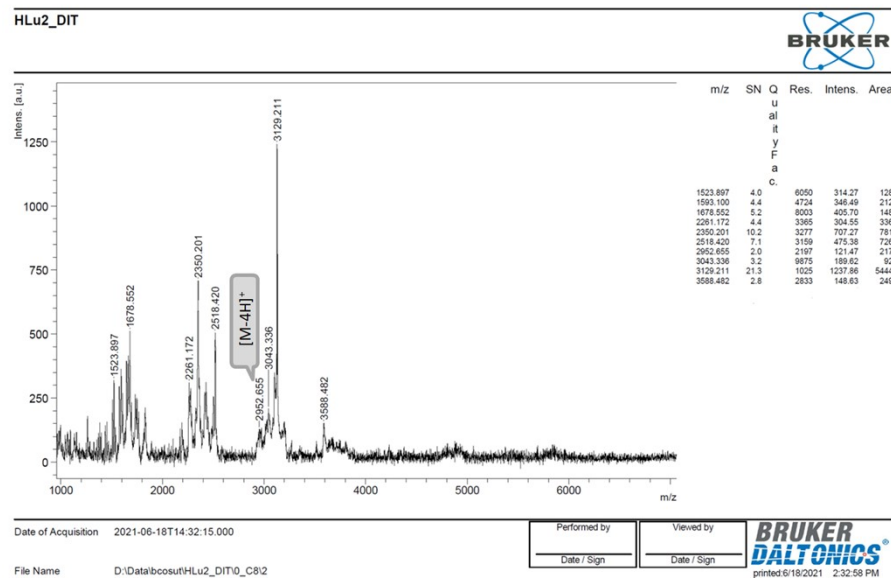

1523.897 m/z: [M-4OCF<sub>3</sub>-2H+DIT]<sup>2+</sup>; 1678.552 m/z: [M-OCF<sub>3</sub>-H+3H<sub>2</sub>O+DIT]<sup>2+</sup>; 2261.172 m/z: [2M+3H+2DIT]<sup>3+</sup>; 2350.201 m/z: [M-7OCF<sub>3</sub>-C<sub>2</sub>H<sub>3</sub>O<sub>2</sub>-7H+3H<sub>2</sub>O]<sup>+</sup>; 2518.420 m/z: [M-6OCF<sub>3</sub>+3H<sub>2</sub>O+Na]<sup>+</sup>; 3043.336 [M+H+4H<sub>2</sub>O+Na]<sup>+</sup>; 3129.211 [2M-OCF<sub>3</sub>-2H+DIT]<sup>2+</sup>; 3588.482 [M-3OCF<sub>3</sub>+2H+H<sub>2</sub>O+2DIT]<sup>+</sup>

## Mass spectrum of compound 7

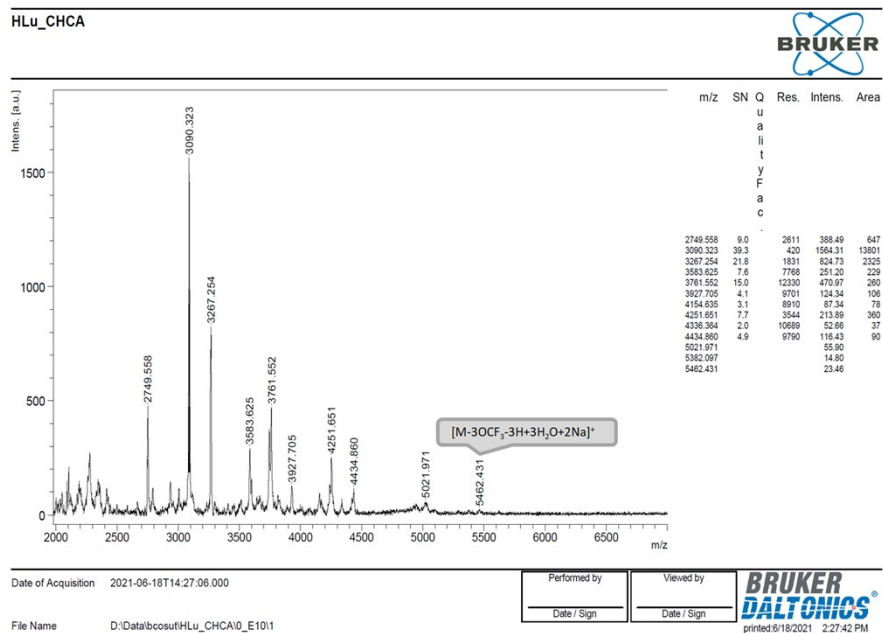

2749.558 m/z:  $[M-2OCF_3-4H+3H_2O]^{2+}$ ; 3090.323 m/z:  $[M-4OCF_3-2H+2H_2O+2DIT]^{2+}$ ; 3267.254 m/z:  $[M-6H+3H_2O+2DIT]^{2+}$ ; 3583.625 m/z:  $[2M-6OCF_3+7H]^{3+}$ ; 3761.552 m/z:  $[2M+2H+H_2O+Na]^{3+}$ ; 3927.705 m/z:  $[2M+3H+6H_2O+DIT]^{3+}$ ; 4251.651 m/z:  $[M-16OCF_3-8H]^+$ ; 4434.860 m/z:  $[M-14OCF_3+5H]^+$ ; 5021.971 m/z:  $[M-7OCF_3-3H]^+$

## FT-IR spectrum of compound 2, 6, and 7

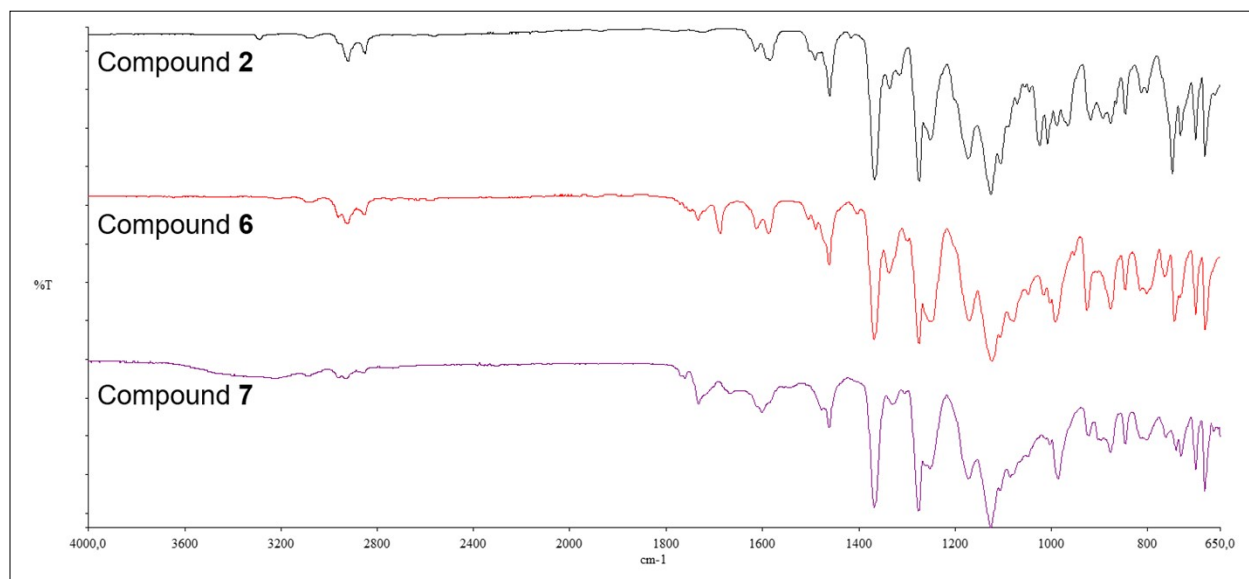

FT-IR spectrum of compound **3-5**

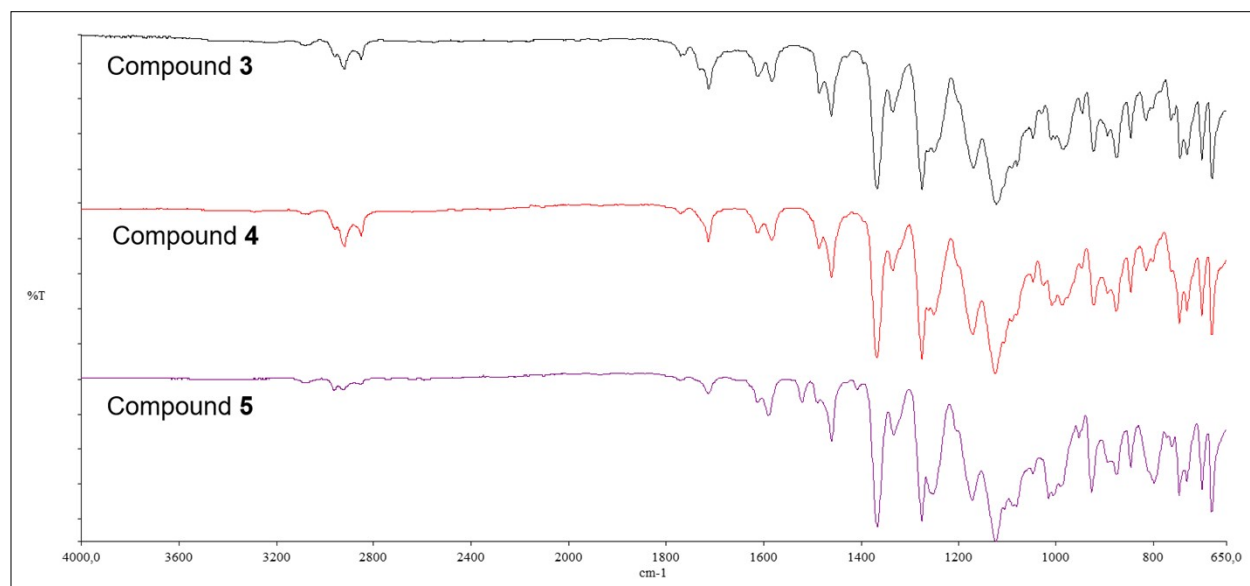

Supplement: d1dt02919c1.pdf [file d1dt02919c1.pdf]
